# Supplementary material for: Synergetic effect in water treatment with mesoporous TiO2/BDD hybrid electrode
Source: Royal Society of Chemistry journal article supplement (doi:10.1039/c9ra10318j), 2020-01-01
Supplement: c9ra10318j1.pdf [file c9ra10318j1.pdf]

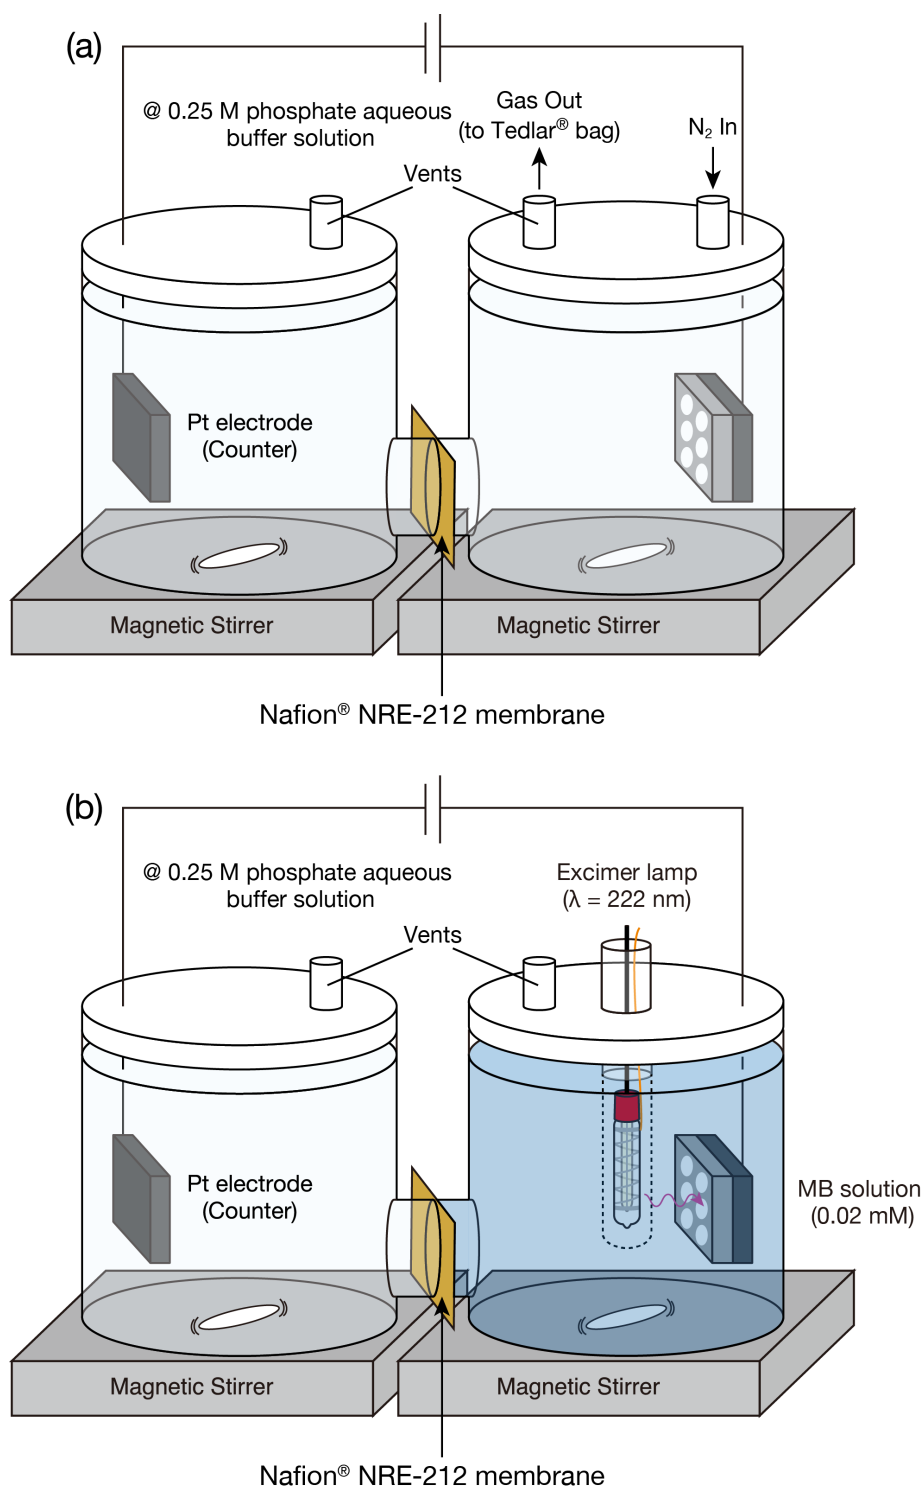

**Figure S1.** Schematic illustration of experimental setups for (a) detection of ozone gas produced during water electrolysis and (b) water treatment test using MB.

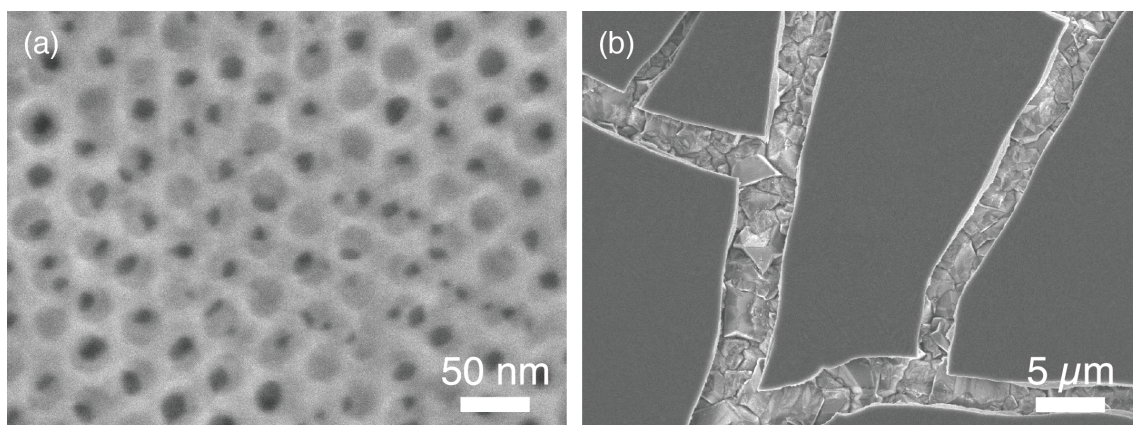

**Figure S2.** (a) Top view and (b) low-magnification SEM images of hybrid electrode.

This figure has been reproduced from N. Suzuki *et al.*<sup>8</sup> in accordance with the Creative Commons Attribution (CC BY) license.
